# Supplementary material for: Competitive tetrel bond and hydrogen bond in benzaldehyde–CO2: characterization via rotational spectroscopy
Source: Royal Society of Chemistry journal article supplement (doi:10.1039/d1cp03608d), 2021-01-01
Supplement: d1cp03608d1.pdf [file d1cp03608d1.pdf]

Electronic Supplementary Material (ESI) for Physical Chemistry Chemical Physics.

This journal is © the Owner Societies 2021

**Competitive tetrel bond and hydrogen bond in benzaldehyde-CO<sub>2</sub>:  
Characterization by rotational spectroscopy**

Hao Wang,<sup>a</sup> Xiujuan Wang,<sup>a</sup> Xiao Tian,<sup>a</sup> Wanying Cheng,<sup>a</sup> Yang Zheng,<sup>a</sup> Daniel  
Obenchain<sup>b</sup> Xuefang Xu<sup>a</sup> and Qian Gou<sup>\*a,c</sup>

<sup>a</sup> School of Chemistry and Chemical Engineering, Chongqing University, Daxuecheng South Rd. 55, 401331, Chongqing, China.

<sup>b</sup> Institut für Physikalische Chemie, Universität Göttingen, Tammannstr. 6, 37077 Göttingen, Germany.

<sup>c</sup> Chongqing Key Laboratory of Theoretical and Computational Chemistry, Daxuecheng South Rd. 55, 401331, Chongqing, China.

Corresponding Authors

\* Qian Gou: [qian.gou@cqu.edu.cn](mailto:qian.gou@cqu.edu.cn);

## Contents:

1. **Table S1.** The calculated spectroscopic parameters of the three isomers of the BA-CO<sub>2</sub> complex at different levels of theory.
2. **Table S2.** Measured intensities (in arbitrary units) of the two isomers for several  $\mu_a$ -type selected transitions.
3. **Tables S3-4.** Partial  $r_0$  and B3LYP-D3(BJ)/6-311++G(d,p) calculated geometries of isomers I and II of BA-CO<sub>2</sub>.
4. **Tables S5-8.** NBO energies ( $> 0.2$  kJ mol<sup>-1</sup>) of complexes between CO<sub>2</sub> and different molecules with aldehyde group (including H<sub>2</sub>CO-CO<sub>2</sub>, FM-CO<sub>2</sub>, BA-CO<sub>2</sub>-I, BA-CO<sub>2</sub>-II) at the RHF/aug-cc-pVTZ level.
5. **Tables S9-10.** Experimental transition frequencies of the observed isomers (I and II) of benzaldehyde-CO<sub>2</sub> (BA-CO<sub>2</sub>).

**Table S1.** The calculated spectroscopic parameters of the three isomers of the BA-CO<sub>2</sub> complex at different levels of theory.

|              |               | <i>A/B/C</i> MHz                 | Max <sup><i>a</i></sup> (%) | $\Delta E_0/\text{cm}^{-1}$ | $\Delta E_{0,\text{BSSE}}/\text{cm}^{-1}$ |     |
|--------------|---------------|----------------------------------|-----------------------------|-----------------------------|-------------------------------------------|-----|
| EXP          | I             | <b>3652.812/403.737/363.943</b>  |                             |                             |                                           |     |
|              | II            | <b>2541.70/503.5558/421.4520</b> |                             | -                           |                                           |     |
| MP2          | 6-311++G(d,p) | I                                | 3616/401/361                | 1.6%                        | 0                                         | 0   |
|              |               | II                               | 2488/506/420                | -2.1%                       | 17                                        | 29  |
|              |               | III                              | 1173/1082/241               | -                           | 543                                       | 631 |
|              | aug-cc-pVTZ   | I                                | 3644/410/369                | 1.6%                        | 0                                         | 0   |
|              |               | II                               | 2525/516/429                | 2.6%                        | 84                                        | 126 |
|              |               | III                              | 1224/1095/759               | -                           | 417                                       | 593 |
| B3LYP-D3(BJ) | 6-311++G(d,p) | I                                | <b>3672/407/366</b>         | 0.8%                        | 0                                         | 0   |
|              |               | II                               | <b>2545/513/427</b>         | 1.8%                        | 47                                        | 53  |
|              |               | III                              | 1151/1075/738               | -                           | 138                                       | 196 |
|              | aug-cc-pVTZ   | I                                | 3681/407/366                | 0.8%                        | 0                                         | 0   |
|              |               | II                               | 2546/513/426                | 1.8%                        | 61                                        | 76  |
|              |               | III                              | 1160/1070/733               | -                           | 167                                       | 190 |
| M06-2X       | 6-311++G(d,p) | I                                | 3702/418/376                | 3.3%                        | 0                                         | 0   |
|              |               | II                               | 2657/517/733                | 3.3%                        | 137                                       | 149 |
|              |               | III                              | 1240/1098/770               | -                           | 179                                       | 268 |
|              | aug-cc-pVTZ   | I                                | 3709/418/376                | 4.5%                        | 0                                         | 0   |
|              |               | II                               | 2643/515/431                | 4.0%                        | 157                                       | 175 |
|              |               | III                              | 1235/1099/765               | -                           | 298                                       | 345 |

<sup>a</sup> The values in parentheses are percentage differences defined as:  $100\% \times (\text{experimental-theoretical})/\text{experimental}$ .

**Table S2.** Measured intensities (in arbitrary units) of the two observed isomers for several  $\mu_a$ -type selected transitions.

| Transition                     | Isomer | Frequency (MHz) | Intensity |
|--------------------------------|--------|-----------------|-----------|
| $8_{08} \leftarrow 7_{07}$     | I      | 6111.0790       | 0.0488    |
|                                | II     | 7211.4173       | 0.0358    |
| $8_{18} \leftarrow 7_{17}$     | I      | 5975.1630       | 0.0442    |
|                                | II     | 7028.2600       | 0.0165    |
| $9_{09} \leftarrow 8_{08}$     | I      | 6865.9630       | 0.0194    |
|                                | II     | 8409.4478       | 0.0146    |
| $12_{012} \leftarrow 11_{011}$ | I      | 9112.0734       | 0.0290    |
|                                | II     | 10589.8151      | 0.0137    |
| $12_{112} \leftarrow 11_{111}$ | I      | 8949.7003       | 0.0522    |
|                                | II     | 10476.5107      | 0.0164    |
| $13_{013} \leftarrow 12_{012}$ | I      | 9854.2714       | 0.0192    |
|                                | II     | 11424.3947      | 0.0171    |
| $13_{113} \leftarrow 12_{012}$ | I      | 9691.3632       | 0.0396    |
|                                | II     | 11331.5250      | 0.0141    |

**Table S3.** Partial  $r_0$  and B3LYP-D3(BJ)/6-311++G(d,p) calculated geometries of isomer I.

| Bond lengths (Å) |                             | Valence angles (°) |                | Dihedral angles (°) |        |
|------------------|-----------------------------|--------------------|----------------|---------------------|--------|
| C1O2             | 1.163                       |                    |                |                     |        |
| C1O3             | 1.159                       | O2C1O3             | 177.1          |                     |        |
| C1O4             | <b>2.804(7)<sup>a</sup></b> | O3C1O4             | <b>93.3(1)</b> | O4C1O3O2            | 180.0  |
| O4C5             | 1.214                       | C1O4C5             | 112.1          | O2C1O4C5            | 0.0    |
| C5C6             | 1.475                       | O4C5C6             | 124.7          | C1O4C5C6            | 180.0  |
| C6C7             | 1.398                       | C5C6C7             | 119.3          | C4C5C6C7            | -180.0 |
| C7O8             | 1.392                       | C6C7O8             | 120.1          | C5C6C7O8            | 180.0  |
| C8C9             | 1.394                       | C7O8C9             | 119.6          | C6C7O8C9            | 0.0    |
| C9O10            | 1.398                       | O8C9O10            | 120.4          | C7O8C9O10           | 0.0    |
| C6C11            | 1.401                       | C7C6C11            | 120.0          | C8C7C6C11           | 0.0    |
| C11H12           | 1.083                       | C6C11H12           | 118.7          | C7C6C11H12          | 180.0  |
| C10H13           | 1.084                       | C9C10H13           | 119.9          | C8C9C10H13          | -180.0 |
| C9H14            | 1.084                       | C8C9H14            | 119.8          | C7C8C9H14           | -180.0 |
| C8H15            | 1.083                       | C9C8H15            | 120.1          | C10C9C8H15          | -180.0 |
| C7H16            | 1.085                       | C8C7H16            | 120.3          | C9C8C7H16           | 180.0  |
| C5H17            | 1.108                       | O6C5H17            | 115.1          | C7O6C5H17           | 0.0    |

<sup>a</sup> Error in parentheses in units of the last digit. The parameters in bold have been adjusted to reproduce the experimental values of rotational constants. Their theoretical values are 2.788 Å and 94.87°, respectively.

**Table S4.** Partial  $r_0$  and B3LYP-D3(BJ)/6-311++G(d,p) calculated geometries of isomer II.

| Bond lengths (Å) |                             | Valence angles (°) |                | Dihedral angles (°) |        |
|------------------|-----------------------------|--------------------|----------------|---------------------|--------|
| C1O2             | 1.163                       |                    |                |                     |        |
| C1O3             | 1.159                       | O2C1O3             | 177.8          |                     |        |
| C1O4             | <b>2.893(9)<sup>a</sup></b> | O3C1O4             | <b>90.7(3)</b> | O4C1O3O2            | 180.0  |
| O4C5             | 1.213                       | C1O4C5             | 151.5          | O2C1O4C5            | 0.0    |
| C5C6             | 1.476                       | O4C5C6             | 125.3          | C1O4C5C6            | 0.0    |
| C6C7             | 1.399                       | C5C6C7             | 119.1          | C4C5C6C7            | -180.0 |
| C7O8             | 1.394                       | C6C7O8             | 120.2          | C5C6C7O8            | 180.0  |
| C8C9             | 1.394                       | C7O8C9             | 119.6          | C6C7O8C9            | 0.0    |
| C9O10            | 1.398                       | O8C9O10            | 120.4          | C7O8C9O10           | 0.0    |
| C6C11            | 1.401                       | C7C6C11            | 120.0          | C8C7C6C11           | 0.0    |
| C11H12           | 1.082                       | C6C11H12           | 119.1          | C7C6C11H12          | 180.0  |
| C10H13           | 1.084                       | C9C10H13           | 119.9          | C8C9C10H13          | 180.0  |
| C9H14            | 1.084                       | C8C9H14            | 119.8          | C7C8C9H14           | -180.0 |
| C8H15            | 1.083                       | C9C8H15            | 120.1          | C10C9C8H15          | -180.0 |
| C7H16            | 1.085                       | C8C7H16            | 120.3          | C9C8C7H16           | 180.0  |
| C5H17            | 1.108                       | O6C5H17            | 115.1          | C7O6C5H17           | 0.0    |

<sup>a</sup> Error in parentheses in units of the last digit. The parameters in bold have been adjusted to reproduce the experimental values of rotational constants. Their theoretical values are 2.871 Å and 90.5°, respectively.

**Table S5** NBO energies ( $> 0.21$  kJ mol<sup>-1</sup>) of the H<sub>2</sub>CO-CO<sub>2</sub> complex.

| Donor NBO                                 | Acceptor NBO  | E (kJ mol <sup>-1</sup> ) | Complexes                                                                          |
|-------------------------------------------|---------------|---------------------------|------------------------------------------------------------------------------------|
| From H <sub>2</sub> CO to CO <sub>2</sub> |               |                           | 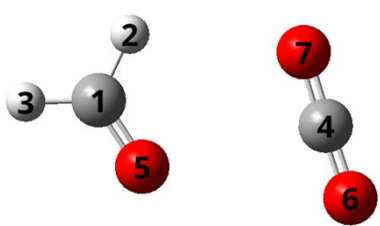 |
| σ(1) C1 - H3                              | RY*(7) C4     | 0.38                      |                                                                                    |
| σ(1) C1 - O5                              | RY*(1) C4     | 0.75                      |                                                                                    |
| σ(1) C1 - O5                              | RY*(5) C4     | 0.21                      |                                                                                    |
| LP (1) O5                                 | RY*(5) C4     | <b>0.38</b>               |                                                                                    |
| LP (1) O5                                 | RY*(7) C4     | <b>0.25</b>               |                                                                                    |
| LP (1) O5                                 | π*(3) C4 – O6 | <b>1.80</b>               |                                                                                    |
| LP (2) O5                                 | RY*(6) C4     | <b>0.25</b>               |                                                                                    |
| LP (2) O5                                 | π*(3) C4 – O6 | <b>4.69</b>               |                                                                                    |
| From CO <sub>2</sub> to H <sub>2</sub> CO |               |                           |                                                                                    |
| LP (2) O7                                 | σ*(1) C1 - H2 | <b>0.38</b>               |                                                                                    |
| LP (2) O7                                 | σ*(1) C1 – H3 | <b>0.46</b>               |                                                                                    |

**Table S6.** NBO energies ( $> 0.21 \text{ kJ mol}^{-1}$ ) of the FM-CO<sub>2</sub> complex.

| Donor NBO                  | Acceptor NBO  | E (kJ mol <sup>-1</sup> ) | Complexes                                                                          |
|----------------------------|---------------|---------------------------|------------------------------------------------------------------------------------|
| From FM to CO <sub>2</sub> |               |                           | 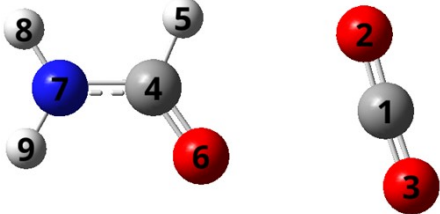 |
| σ(1) C4 – H5               | RY*(6) C1     | 0.29                      |                                                                                    |
| σ(1) C4 – H5               | RY*(9) C1     | 0.59                      |                                                                                    |
| π(1) C4 – O6               | π*(1) C1 – O3 | 0.21                      |                                                                                    |
| π(2) C4 – O6               | RY*(1) C1     | 0.67                      |                                                                                    |
| π(2) C4 – O6               | RY*(5) C1     | 0.25                      |                                                                                    |
| σ(1) C4 – N7               | RY*(5) C1     | 0.21                      |                                                                                    |
| LP (1) O6                  | RY*(5) C1     | <b>0.92</b>               |                                                                                    |
| LP (1) O6                  | RY*(3) O3     | 0.21                      |                                                                                    |
| LP (1) O6                  | RY*(4) O3     | 0.25                      |                                                                                    |
| LP (1) O6                  | π*(3) C1 – O3 | <b>2.51</b>               |                                                                                    |
| LP (2) O6                  | RY*(6) C1     | <b>0.50</b>               |                                                                                    |
| LP (2) O6                  | π*(3) C1 – O3 | <b>6.90</b>               |                                                                                    |
| From CO <sub>2</sub> to FM |               |                           |                                                                                    |
| π(1) C1 – O2               | RY*(1) C4     | 0.25                      |                                                                                    |
| π(1) C1 – O2               | RY*(4) C4     | 0.33                      |                                                                                    |
| LP (1) O2                  | σ*(1) C4 – H5 | <b>0.92</b>               |                                                                                    |
| LP (1) O2                  | σ*(1) C4 – N7 | 0.25                      |                                                                                    |
| LP (2) O2                  | σ*(1) C4 – H5 | <b>0.80</b>               |                                                                                    |
| LP (2) O2                  | σ*(1) C4 – N7 | 0.24                      |                                                                                    |



**Table S7.** NBO energies ( $> 0.21$  kJ mol<sup>-1</sup>) of the BA-CO<sub>2</sub>-I complex.

| Donor NBO                  | Acceptor NBO    | E (kJ mol <sup>-1</sup> ) | Complexes                                                                          |
|----------------------------|-----------------|---------------------------|------------------------------------------------------------------------------------|
| From BA to CO <sub>2</sub> |                 |                           | 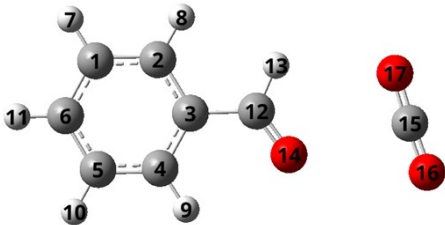 |
| σ(1) C3 – C12              | RY*(5) C15      | 1.76                      |                                                                                    |
| π(1) C12 – O14             | RY*(1) C15      | 0.54                      |                                                                                    |
| π(1) C12 – O14             | RY*(5) C15      | 0.29                      |                                                                                    |
| π(1) C12 – O14             | RY*(3) O16      | 0.29                      |                                                                                    |
| π(2) C12 – O14             | LP*(2) C15      | 0.25                      |                                                                                    |
| LP (1) O14                 | π*(1) C15 – O16 | <b>3.01</b>               |                                                                                    |
| LP (1) O14                 | RY*(5) C15      | <b>0.59</b>               |                                                                                    |
| LP (1) O14                 | RY*(3) O16      | 0.25                      |                                                                                    |
| LP (2) O14                 | π*(1) C15 – O16 | <b>8.66</b>               |                                                                                    |
| LP (2) O14                 | RY*(7) C15      | <b>0.33</b>               |                                                                                    |
| From CO <sub>2</sub> to BA |                 |                           |                                                                                    |
| π(1) C15 – O17             | RY*(1) C12      | 0.25                      |                                                                                    |
| π(1) C15 – O17             | RY*(5) C12      | 0.25                      |                                                                                    |
| π(1) C15 – O17             | RY*(3) H13      | 0.21                      |                                                                                    |
| LP (1) O17                 | RY*(3) H13      | <b>1.67</b>               |                                                                                    |
| LP (1) O17                 | σ*(1) C12 – H13 | <b>0.25</b>               |                                                                                    |
| LP (2) O17                 | σ*(1) C3 – C12  | 0.67                      |                                                                                    |
| LP (2) O17                 | σ*(1) C12 – H13 | <b>0.29</b>               |                                                                                    |

**Table S8.** NBO energies ( $> 0.21$  kJ mol<sup>-1</sup>) of the BA-CO<sub>2</sub>-II complex.

| Donor NBO                  | Acceptor NBO    | E (kJ mol <sup>-1</sup> ) | Complexes                                                                          |
|----------------------------|-----------------|---------------------------|------------------------------------------------------------------------------------|
| From BA to CO <sub>2</sub> |                 |                           | 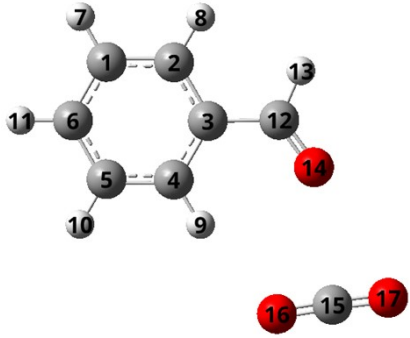 |
| σ(1) C3 – C4               | RY*(5) O16      | 0.33                      |                                                                                    |
| σ(1) C4 – C5               | RY*(6) C15      | 0.25                      |                                                                                    |
| π(1) C12 – O14             | RY*(4) C15      | 0.25                      |                                                                                    |
| π(1) C12 – O14             | RY*(5) C15      | 0.75                      |                                                                                    |
| π(1) C12 – O14             | RY*(6) C15      | 0.33                      |                                                                                    |
| π(1) C12 – O14             | RY*(3) O17      | 0.29                      |                                                                                    |
| π(2) C12 – O14             | RY*(7) C15      | 0.21                      |                                                                                    |
| LP (1) O14                 | π*(1) C15 – O16 | <b>3.68</b>               |                                                                                    |
| LP (1) O14                 | RY*(5) C15      | <b>0.38</b>               |                                                                                    |
| LP (1) O14                 | RY*(3) O17      | 0.33                      |                                                                                    |
| LP (2) O14                 | π*(1) C15 – O16 | <b>1.72</b>               |                                                                                    |
| From CO <sub>2</sub> to BA |                 |                           |                                                                                    |
| π(1) C15 – O17             | RY*(2) H9       | 0.21                      |                                                                                    |
| LP (1) O16                 | RY*(1) H9       | <b>1.42</b>               |                                                                                    |
| LP (1) O16                 | RY*(3) H9       | <b>0.25</b>               |                                                                                    |
| LP (1) O16                 | σ*(1) C4 – H9   | <b>1.97</b>               |                                                                                    |
| LP (2) O16                 | RY*(1) H9       | <b>1.38</b>               |                                                                                    |
| LP (2) O16                 | σ*(1) C4 – H9   | <b>2.55</b>               |                                                                                    |

**Table S9.** Experimental transition frequencies  $\nu$  of the parent species of isomer I with quantum numbers and difference to calculated frequencies  $\Delta\nu$  in the least squares fit.

| Transition     |                              | $\nu/\text{MHz}$ | $\Delta\nu/\text{kHz}$ |
|----------------|------------------------------|------------------|------------------------|
| $J' K_a' K_c'$ | $\leftarrow J'' K_a'' K_c''$ |                  |                        |
| 8 0 8          | 7 0 7                        | 6111.0812        | 0.6                    |
| 8 1 8          | 7 1 7                        | 5975.1636        | -0.1                   |
| 8 1 7          | 7 1 6                        | 6292.9963        | 0.7                    |
| 9 0 9          | 8 0 8                        | 6865.9630        | -1.5                   |
| 9 1 9          | 8 1 8                        | 6719.9006        | -1.2                   |
| 9 1 8          | 8 1 7                        | 7077.0880        | -0.6                   |
| 9 2 8          | 8 2 7                        | 6902.4601        | 0.5                    |
| 9 2 7          | 8 2 6                        | 6945.4757        | -1.4                   |
| 9 3 7          | 8 3 6                        | 6914.5910        | -0.9                   |
| 9 3 6          | 8 3 5                        | 6915.5479        | 0.2                    |
| 9 4 6          | 8 4 5                        | 6912.4970        | 3.9                    |
| 9 5 5          | 8 5 4                        | 6911.4014        | -1.4                   |
| 10 0 10        | 9 0 9                        | 7617.8733        | 10.2                   |
| 10 1 9         | 9 1 8                        | 7860.2267        | -0.9                   |
| 10 2 9         | 9 2 8                        | 7667.4534        | -1.1                   |
| 10 2 8         | 9 2 7                        | 7726.1991        | 0.9                    |
| 10 3 8         | 9 3 7                        | 7684.0042        | -0.9                   |
| 10 3 7         | 9 3 6                        | 7685.6411        | -0.8                   |
| 10 4 7         | 9 4 6                        | 7681.2882        | 8.3                    |
| 10 5 6         | 9 5 5                        | 7679.7843        | -0.1                   |
| 11 0 11        | 10 0 10                      | 8366.5989        | -1.0                   |
| 11 1 10        | 10 1 9                       | 8642.2713        | -1.6                   |
| 11 2 10        | 10 2 9                       | 8431.8347        | -2.8                   |
| 11 2 9         | 10 2 8                       | 8509.4497        | -1.7                   |
| 11 3 9         | 10 3 8                       | 8453.6988        | 0.0                    |
| 11 3 8         | 10 3 7                       | 8456.3536        | -1.2                   |
| 11 4 8         | 10 4 7                       | 8450.2944        | -1.3                   |
| 11 4 7         | 10 4 6                       | 8450.3308        | 1.5                    |
| 11 5 7         | 10 5 6                       | 8448.3051        | -2.4                   |
| 11 5 6         | 10 5 5                       | 8448.3051        | -2.6                   |
| 12 0 12        | 11 0 11                      | 9112.0737        | -0.2                   |
| 12 1 12        | 11 1 11                      | 8949.7010        | 0.2                    |
| 12 1 11        | 11 1 10                      | 9423.0739        | -0.3                   |
| 12 2 11        | 11 2 10                      | 9195.5493        | 0.3                    |
| 12 2 10        | 11 2 9                       | 9295.2720        | -0.3                   |
| 12 3 10        | 11 3 9                       | 9223.6655        | 0.1                    |
| 12 3 9         | 11 3 8                       | 9227.7880        | -1.0                   |
| 12 4 9         | 11 4 8                       | 9219.5607        | -0.8                   |

|         |         |            |      |
|---------|---------|------------|------|
| 12 4 8  | 11 4 7  | 9219.6239  | -0.6 |
| 12 5 8  | 11 5 7  | 9216.9866  | 0.3  |
| 12 5 7  | 11 5 6  | 9216.9866  | -0.2 |
| 12 6 7  | 11 6 6  | 9215.6301  | -1.7 |
| 12 6 6  | 11 6 5  | 9215.6301  | -1.7 |
| 13 0 13 | 12 0 12 | 9854.2713  | 0.0  |
| 13 1 13 | 12 1 12 | 9691.3638  | 0.4  |
| 13 1 12 | 12 1 11 | 10202.4701 | 0.2  |
| 13 2 12 | 12 2 11 | 9958.5302  | -0.5 |
| 13 2 11 | 12 2 10 | 10083.6078 | -0.6 |
| 13 3 11 | 12 3 10 | 9993.8902  | 1.8  |
| 13 3 10 | 12 3 9  | 10000.0581 | -0.6 |
| 13 4 10 | 12 4 9  | 9989.0970  | -0.6 |
| 13 4 9  | 12 4 8  | 9989.2095  | 0.0  |
| 13 5 9  | 12 5 8  | 9985.8371  | 2.1  |
| 13 5 8  | 12 5 7  | 9985.8371  | 1.1  |
| 14 0 14 | 13 0 13 | 10593.2724 | 1.2  |
| 14 1 14 | 13 1 13 | 10432.1808 | 0.3  |
| 14 1 13 | 13 1 12 | 10980.2868 | 0.1  |
| 14 2 13 | 13 2 12 | 10720.7259 | 0.8  |
| 14 2 12 | 13 2 11 | 10874.3128 | 0.4  |
| 14 3 12 | 13 3 11 | 10764.3413 | -0.9 |
| 14 3 11 | 13 3 10 | 10773.2894 | 0.0  |
| 14 4 11 | 13 4 10 | 10758.9229 | -0.2 |
| 14 4 10 | 13 4 9  | 10759.1124 | -0.8 |
| 14 5 10 | 13 5 9  | 10754.8679 | 0.3  |
| 14 5 9  | 13 5 8  | 10754.8679 | -1.7 |
| 15 0 15 | 14 0 14 | 11329.2448 | -0.4 |
| 15 1 15 | 14 1 14 | 11172.1391 | -0.3 |
| 15 1 14 | 14 1 13 | 11756.3395 | 0.1  |
| 15 2 14 | 14 2 13 | 11482.0759 | -0.3 |
| 15 2 13 | 14 2 12 | 11667.1426 | 0.0  |
| 15 3 13 | 14 3 12 | 11534.9924 | 0.2  |
| 15 3 12 | 14 3 11 | 11547.6180 | -0.5 |
| 15 4 12 | 14 4 11 | 11529.0563 | 0.6  |
| 15 4 11 | 14 4 10 | 11529.3688 | 2.4  |
| 15 5 11 | 14 5 10 | 11524.1003 | 1.9  |
| 15 5 10 | 14 5 9  | 11524.1003 | -1.9 |
| 2 2 1   | 1 1 0   | 11322.3520 | -0.4 |
| 2 2 0   | 1 1 1   | 11362.5134 | 1.4  |
| 3 2 1   | 3 1 2   | 9689.5499  | -0.7 |
| 3 2 2   | 3 1 3   | 9926.5071  | -2.2 |
| 3 2 2   | 2 1 1   | 12050.2338 | 0.6  |

|         |         |            |      |
|---------|---------|------------|------|
| 3 2 1   | 2 1 2   | 12171.4387 | 0.1  |
| 3 3 0   | 3 2 1   | 16343.1653 | 1.0  |
| 3 3 1   | 3 2 2   | 16344.9780 | -0.7 |
| 3 3 1   | 2 2 0   | 18647.6492 | -0.4 |
| 4 1 4   | 3 0 3   | 6141.5701  | 2.3  |
| 4 2 2   | 4 1 3   | 9614.0438  | 1.6  |
| 4 2 3   | 4 1 4   | 10006.5402 | -0.2 |
| 4 2 3   | 3 1 2   | 12758.1591 | -0.1 |
| 4 2 2   | 3 1 3   | 13002.3821 | -0.2 |
| 4 3 1   | 4 2 2   | 16340.5505 | -0.3 |
| 4 3 2   | 4 2 3   | 16345.9826 | -1.6 |
| 5 1 5   | 4 0 4   | 6811.8132  | 1.0  |
| 5 2 3   | 5 1 4   | 9522.6144  | -2.3 |
| 5 2 4   | 5 1 5   | 10106.7915 | -0.2 |
| 5 2 4   | 4 1 3   | 13446.1632 | -0.9 |
| 5 2 3   | 4 1 4   | 13856.8153 | -0.1 |
| 5 3 2   | 5 2 3   | 16335.3754 | 0.8  |
| 5 3 3   | 5 2 4   | 16348.0216 | -0.3 |
| 6 1 6   | 5 0 5   | 7464.4997  | -0.3 |
| 6 2 4   | 6 1 5   | 9417.2479  | 1.6  |
| 6 2 5   | 6 1 6   | 10227.3944 | 0.7  |
| 6 2 5   | 5 1 4   | 14114.3177 | -0.6 |
| 6 2 4   | 5 1 5   | 14736.5861 | -0.3 |
| 6 3 3   | 6 2 4   | 16326.3874 | 0.2  |
| 6 3 4   | 6 2 5   | 16351.6009 | 0.0  |
| 7 1 7   | 6 0 6   | 8100.9209  | -0.5 |
| 7 2 5   | 7 1 6   | 9300.2901  | 2.0  |
| 7 2 6   | 7 1 7   | 10368.4918 | -0.1 |
| 7 2 6   | 6 1 5   | 14762.7334 | -0.1 |
| 7 2 5   | 6 1 6   | 15643.9019 | -0.2 |
| 7 3 4   | 7 2 5   | 16312.1231 | 0.4  |
| 7 3 5   | 7 2 6   | 16357.3218 | 0.8  |
| 8 1 8   | 7 0 7   | 8722.6342  | -1.6 |
| 8 2 6   | 8 1 7   | 9174.4690  | 0.5  |
| 8 2 7   | 8 1 8   | 10530.2401 | -1.0 |
| 9 1 9   | 8 0 8   | 9331.4563  | -0.7 |
| 9 2 7   | 9 1 8   | 9042.8567  | -0.4 |
| 9 2 8   | 9 1 9   | 10712.8007 | 1.8  |
| 10 1 10 | 9 0 9   | 9929.4281  | 0.8  |
| 10 2 9  | 10 1 10 | 10916.3183 | -0.3 |
| 11 1 11 | 10 0 10 | 10518.7788 | 0.3  |
| 12 1 12 | 11 0 11 | 11101.8777 | -1.7 |

**Table S10.** Experimental transition frequencies  $\nu$  of the parent species of isomer II with quantum numbers and difference to calculated frequencies  $\Delta\nu$  in the least squares fit.

| Transition     |                              | $\nu/\text{MHz}$ | $\Delta\nu/\text{kHz}$ |
|----------------|------------------------------|------------------|------------------------|
| $J' K_a' K_c'$ | $\leftarrow J'' K_a'' K_c''$ |                  |                        |
| 6 0 6          | 5 0 5                        | 5467.1305        | -0.4                   |
| 6 1 6          | 5 1 5                        | 5285.4426        | 0.8                    |
| 6 1 5          | 5 1 4                        | 5775.5132        | -0.5                   |
| 6 2 4          | 5 2 3                        | 5621.8333        | 0.5                    |
| 6 2 5          | 5 2 4                        | 5539.0510        | -0.1                   |
| 6 3 4          | 5 3 3                        | 5562.1686        | -1.7                   |
| 6 3 3          | 5 3 2                        | 5564.6811        | 1.0                    |
| 7 0 7          | 6 0 6                        | 6345.2585        | -0.2                   |
| 7 1 7          | 6 1 6                        | 6158.4027        | -0.9                   |
| 7 1 6          | 6 1 5                        | 6727.4386        | 0.6                    |
| 7 2 5          | 6 2 4                        | 6585.5987        | 0.1                    |
| 7 2 6          | 6 2 5                        | 6456.0615        | 2.2                    |
| 7 3 4          | 6 3 3                        | 6498.0788        | 0.0                    |
| 7 3 5          | 6 3 4                        | 6492.4503        | -2.0                   |
| 7 4 3          | 6 4 2                        | 6487.2249        | 0.2                    |
| 7 4 4          | 6 4 3                        | 6487.1424        | 0.4                    |
| 8 0 8          | 7 0 7                        | 7211.4172        | -0.2                   |
| 8 1 8          | 7 1 7                        | 7028.2606        | 0.0                    |
| 8 1 7          | 7 1 6                        | 7673.8018        | 0.0                    |
| 8 2 7          | 7 2 6                        | 7370.248         | -0.3                   |
| 8 2 6          | 7 2 5                        | 7558.4062        | -0.1                   |
| 8 3 6          | 7 3 5                        | 7423.6745        | 0.4                    |
| 8 3 5          | 7 3 4                        | 7434.8644        | 0.4                    |
| 8 4 5          | 7 4 4                        | 7416.9997        | -0.7                   |
| 8 4 4          | 7 4 3                        | 7417.2270        | -0.5                   |
| 8 5 4          | 7 5 3                        | 7412.0393        | 3.0                    |
| 8 5 3          | 7 5 2                        | 7412.0393        | 0.9                    |
| 9 0 9          | 8 0 8                        | 8066.7358        | 0.7                    |
| 9 1 9          | 8 1 8                        | 7894.9308        | -0.2                   |
| 9 1 8          | 8 1 7                        | 8613.3740        | 0.1                    |
| 9 2 8          | 8 2 7                        | 8281.2464        | -0.2                   |
| 9 2 7          | 8 2 6                        | 8538.6692        | 1.5                    |
| 9 3 7          | 8 3 6                        | 8355.6105        | 2.1                    |
| 9 3 6          | 8 3 5                        | 8375.9554        | 1.0                    |
| 9 4 6          | 8 4 5                        | 8348.0550        | -2.4                   |
| 9 4 5          | 8 4 4                        | 8348.5997        | -1.4                   |
| 9 5 5          | 8 5 4                        | 8341.0452        | -2.8                   |

|         |         |            |      |
|---------|---------|------------|------|
| 9 5 4   | 8 5 3   | 8341.0573  | 2.5  |
| 10 0 10 | 9 0 9   | 8913.2442  | 0.5  |
| 10 1 10 | 9 1 9   | 8758.4392  | 0.9  |
| 10 1 9  | 9 1 8   | 9544.7937  | -0.4 |
| 10 2 9  | 9 2 8   | 9188.7053  | -0.6 |
| 10 2 8  | 9 2 7   | 9523.8565  | -1.6 |
| 10 3 8  | 9 3 7   | 9287.9235  | 0.5  |
| 10 3 7  | 9 3 6   | 9322.3947  | -1.5 |
| 10 4 7  | 9 4 6   | 9280.4135  | 1.4  |
| 10 4 6  | 9 4 5   | 9281.5855  | -0.4 |
| 11 0 11 | 10 0 10 | 9753.4465  | -0.8 |
| 11 1 11 | 10 1 10 | 9618.8992  | -0.8 |
| 11 1 10 | 10 1 9  | 10466.6194 | 0.9  |
| 11 2 10 | 10 2 9  | 10092.3100 | 0.1  |
| 11 2 9  | 10 2 8  | 10510.9346 | -0.1 |
| 11 3 9  | 10 3 8  | 10220.1901 | -2.6 |
| 11 3 8  | 10 3 7  | 10275.3146 | -0.9 |
| 12 0 12 | 11 0 11 | 10589.816  | 0.7  |
| 12 1 12 | 11 1 11 | 10476.5108 | -0.5 |
| 12 1 11 | 11 1 10 | 11377.4141 | -0.2 |
| 12 2 11 | 11 2 10 | 10991.7828 | -1.0 |
| 12 2 10 | 11 2 9  | 11496.8291 | 0.8  |
| 12 3 10 | 11 3 9  | 11151.9168 | 0.6  |
| 12 3 9  | 11 3 8  | 11235.8205 | -1.5 |
| 13 0 13 | 12 0 12 | 11424.3955 | 0.9  |
| 13 1 13 | 12 1 12 | 11331.5253 | 0.9  |
| 13 1 12 | 12 1 11 | 12275.9160 | 0.4  |
| 13 2 12 | 12 2 11 | 11886.9055 | 0.6  |
| 13 2 11 | 12 2 10 | 12478.8149 | 1.8  |
| 13 3 11 | 12 3 10 | 12082.5426 | 3.9  |
| 13 3 10 | 12 3 9  | 12204.851  | 1.4  |
| 14 0 14 | 13 0 13 | 12258.6383 | -0.4 |
| 14 1 14 | 13 1 13 | 12184.2267 | -0.4 |
| 14 1 13 | 13 1 12 | 13161.2364 | -1.3 |
| 14 2 13 | 13 2 12 | 12777.5120 | -0.6 |
| 14 2 12 | 13 2 11 | 13454.6579 | -2.2 |
| 15 0 15 | 14 0 14 | 13093.4292 | 1.5  |
| 15 1 15 | 14 1 14 | 13034.9200 | -1.7 |
